# Supplementary material for: Foot posture as a risk factor for lower limb overuse injury: a systematic review and meta‐analysis
Source: Springer Nature journal article supplement (doi:10.1186/s13047-014-0055-4), 2014-01-01
Supplement: MOESM4 [file 7114372]

|                                                                           |   |     |     |     |     |     |     |     |     |     |     |    |
|---------------------------------------------------------------------------|---|-----|-----|-----|-----|-----|-----|-----|-----|-----|-----|----|
| Q32. Reported validity of overuse injury measurement                      |   |     |     |     |     |     |     |     |     |     |     | 0  |
| Q33. Reported standardisation of overuse injury measurement               |   |     |     |     |     |     |     |     |     |     |     | 8  |
| Q34. Observation time comparability                                       |   |     |     |     |     |     |     |     |     |     |     | 16 |
| Q35. Reported prior disease/history                                       |   |     |     |     |     |     |     |     |     |     |     | 4  |
| Q36. Adjustment for intrinsic variables                                   |   |     |     |     |     |     |     |     |     |     |     | 3  |
| Q37. Adjustment for extrinsic variables                                   |   |     |     |     |     |     |     |     |     |     |     | 1  |
| Q38. Is follow up time adequate                                           |   |     |     |     |     |     |     |     |     |     |     | 16 |
| Q39. Follow up time differences                                           |   |     |     |     |     |     |     |     |     |     |     | 19 |
| Q40. Reported data ≥3 levels of associated factors                        |   |     |     |     |     |     |     |     |     |     |     | 18 |
| Q41. Reported data for subgroups of participants (e.g. by gender or age)  |   |     |     |     |     |     |     |     |     |     |     | 13 |
| Q42. Generalisability of results to study population (participation rate) |   |     |     |     |     |     |     |     |     |     |     | 20 |
| Q43. Generalisability of results to other populations (random sampling)   |   |     |     |     |     |     |     |     |     |     |     | 1  |
| Overall quality score (range 0 to 2)                                      | 1 | 1.2 | 1.1 | 1.3 | 1.3 | 0.8 | 1.4 | 1.5 | 1.1 | 1.3 | 1.5 |    |
